# Supplementary material for: Bis(tert-butyl)sulfurdiimide, S(NBut)2, and tris(tert-butyl)sulfurtriimide, S(NBut)3: structures by gas electron diffraction, X-ray crystallography and ab initio calculations
Source: Royal Society of Chemistry journal article supplement (doi:10.1039/b207193b), 2002-01-01
Supplement: b207193b.pdf [file b207193b.pdf]

**Table S1** Selected interatomic distances ( $r_a$ /pm) and mean amplitudes of vibration ( $u$ /pm)  
for S(NBu<sup>1</sup>)<sub>2</sub> from the GED study.<sup>a,b</sup>

| No.      | Atom pair      | $r_a$ /pm | $u$ /pm <sup>c</sup>    |
|----------|----------------|-----------|-------------------------|
| $u_1$    | C(6) - C(4)    | 152.6(2)  | 5.7(2)                  |
| $u_2$    | C(6) - H(12)   | 111.8(1)  | 7.6(2)                  |
| $u_3$    | N(2) - S(1)    | 153.8(3)  | 4.2 (tied to $u_1$ )    |
| $u_4$    | N(3) - S(1)    | 156.5(4)  | 4.3 (tied to $u_1$ )    |
| $u_5$    | C(10) - C(9)   | 250.1(5)  | 6.5(6)                  |
| $u_6$    | C(7) - C(6)    | 250.4(5)  | 6.5 (tied to $u_5$ )    |
| $u_7$    | C(5) ... S(1)  | 258.4(9)  | 5.1 (tied to $u_{11}$ ) |
| $u_8$    | C(9) ... S(1)  | 283.4(11) | 10.6(5)                 |
| $u_9$    | C(4) ... S(1)  | 267.3(7)  | 5.2(tied to $u_5$ )     |
| $u_{10}$ | C(6) ... S(1)  | 322.2(6)  | 11.4(tied to $u_8$ )    |
| $u_{12}$ | C(4) - N(2)    | 146.2(4)  | 5.6(tied to $u_1$ )     |
| $u_{13}$ | C(5) - N(3)    | 147.0(4)  | 5.6(tied to $u_1$ )     |
| $u_{14}$ | C(10) ... S(1) | 359.7(8)  | 30.0 (20)               |
| $u_{16}$ | C(7) ... S(1)  | 385.9(8)  | 9.7(tied to $u_{14}$ )  |
| $u_{17}$ | N(3) ... N(2)  | 265.7(8)  | 6.1(6)                  |
| $u_{18}$ | C(6)-N(2)      | 246.4(8)  | 7.7(tied to $u_{17}$ )  |
| $u_{19}$ | C(7) ... N(2)  | 235.2(9)  | 7.1(tied to $u_{17}$ )  |
| $u_{20}$ | C(9) ... N(3)  | 253.7(9)  | 7.1(tied to $u_{17}$ )  |
| $u_{21}$ | C(10) ... N(3) | 238.4(7)  | 7.6(tied to $u_{17}$ )  |
| $u_{22}$ | C(8) ...N(2)   | 246.4(8)  | 7.7(tied to $u_{17}$ )  |

Supplementary Material (ESI) for Dalton Transactions  
This journal is © The Royal Society of Chemistry 2002

|            |                |           |                          |
|------------|----------------|-----------|--------------------------|
| $u_{23}$   | C(11) ... N(3) | 238.4(7)  | 7.6(tied to $u_{17}$ )   |
| $u_{24}$   | C(4) ... N(3)  | 313.3(9)  | 12(1)                    |
| $u_{25}$   | C(8) ... N(3)  | 322.3(9)  | 24.2(tied to $u_{24}$ )  |
| $u_{27}$   | C(5) ... N(2)  | 397.6(6)  | 5.7(5)                   |
| $u_{28}$   | C(9) ... N(2)  | 437.3(11) | 9.3(tied to $u_{27}$ )   |
| $u_{29}$   | C(7) ... N(3)  | 460.6 (8) | 8.6(tied to $u_{27}$ )   |
| $u_{30}$   | C(10) ... N(2) | 483.4(9)  | 15.6(tied to $u_{27}$ )  |
| $u_{32}$   | C(8) ... C(5)  | 459.4(11) | 20.6(tied to $u_{27}$ )  |
| $u_{34}$   | C(5) ... C(4)  | 460.0(8)  | 9.9(tied to $u_{27}$ )   |
| $u_{35}$   | C(10) ... C(8) | 479.1(19) | 29.4((tied to $u_{27}$ ) |
| $u_{37}$   | C(9) ... C(4)  | 537.1(12) | 15.0(10)                 |
| $u_{38}$   | C(10) ... C(4) | 525.5(12) | 25.9(tied to $u_{37}$ )  |
| $u_{40}$   | C(9) ... C(8)  | 555.4(12) | 33.7(tied to $u_{37}$ )  |
| $u_{42}$   | C(11) ... C(8) | 540.5(16) | 45.1(tied to $u_{37}$ )  |
| $u_{44}^d$ | C(7) ... C(5)  | 605.6(77) | 10.5(9)                  |
| $u_{45}^d$ | C(9) ... C(7)  | 667.6(13) | 12.4(9)                  |
| $u_{46}$   | C(10) ... C(7) | 672.4(12) | 21.9(tied to $u_{45}$ )  |

<sup>a</sup> See Figure 1 for atom numbering; all other distances were included in the refinement, but are not listed here.

<sup>b</sup> Estimated standard deviations, obtained in the least-squares refinement, are given in parentheses.

<sup>c</sup> Amplitudes not refined were fixed at the values obtained using the HF/6-31G\* force field.

<sup>d</sup> Restraints applied to  $u_{44}$  [10.2(10)] and  $u_{45}$  [11.5(11)].

**Table S2** Least-squares correlation matrix ( $\times 100$ ) for  $S(NBu^t)_2$ .<sup>a</sup>

|          | $p_7$ | $p_9$ | $p_{11}$ | $p_{12}$ | $u_1$ | $u_{17}$ | $k_1$ |
|----------|-------|-------|----------|----------|-------|----------|-------|
| $p_9$    | 64    |       |          |          |       |          |       |
| $p_{11}$ |       | -71   |          |          |       |          |       |
| $u_5$    | -64   | -68   |          |          |       |          |       |
| $u_8$    |       | 52    | -52      |          |       |          |       |
| $u_{14}$ |       |       |          |          |       | -64      |       |
| $u_{17}$ | -76   |       |          |          |       |          |       |
| $k_1$    |       |       |          | -54      | 58    |          |       |
| $k_2$    |       |       |          |          |       |          | 50    |

<sup>a</sup> Only elements with absolute values  $\geq 50\%$  are shown;  $k_1$  and  $k_2$  are scale factors.

**Table S3** Interatomic distances ( $r/\text{pm}$ ) and amplitudes of vibration ( $u/\text{pm}$ ) for the restrained GED structure of  $S(NBu^t)_3$ .<sup>a,b</sup>

| No.      | Atom Pair    | $r_a/\text{pm}$ | $u/\text{pm}^c$      |
|----------|--------------|-----------------|----------------------|
| $u_1$    | C(5)-C(8)    | 150.8(2)        | 5.0(2)               |
| $u_2$    | S(1)-N(2)    | 153.5(3)        | 3.8 (tied to $u_1$ ) |
| $u_3$    | N(2)-C(5)    | 147.2(4)        | 5.0 (tied to $u_1$ ) |
| $u_4$    | N(2)...C(8)  | 250.0(5)        | 7.4(4)               |
| $u_5$    | C(8)-H(17)   | 112.9(3)        | 8.4(3)               |
| $u_6$    | S(1)...C(5)  | 264.2(4)        | 8.6(8)               |
| $u_7$    | S(1)...C(8)  | 331.0(8)        | 9.6(5)               |
| $u_8$    | S(1)...C(11) | 382.3(4)        | 7.6(6)               |
| $u_9$    | S(1)...C(12) | 316.6(7)        | 9.6 (tied to $u_7$ ) |
| $u_{10}$ | S(1)...H(19) | 311.9(24)       | 20.0 (fixed)         |
| $u_{11}$ | S(1)...H(29) | 282.7(27)       | 20.0 (fixed)         |
| $u_{12}$ | N(2)...N(3)  | 265.8(5)        | 4.8(5)               |
| $u_{13}$ | N(2)...H(17) | 275.8(22)       | 16.3 (fixed)         |
| $u_{14}$ | N(2)...H(18) | 347.7(7)        | 9.9 (fixed)          |
| $u_{15}$ | N(2)...H(19) | 285.8(21)       | 16.2 (fixed)         |
| $u_{16}$ | N(3)...C(5)  | 310.8(7)        | 8.9 (tied to $u_7$ ) |

Supplementary Material (ESI) for Dalton Transactions  
This journal is © The Royal Society of Chemistry 2002

|            |               |           |                          |
|------------|---------------|-----------|--------------------------|
| $u_{17}$   | N(3)...C(8)   | 334.2(15) | 14.7 (tied to $u_7$ )    |
| $u_{18}$   | N(3)...C(11)  | 456.4(7)  | 10.3 (tied to $u_{21}$ ) |
| $u_{19}$   | N(3)...C(12)  | 316.7(12) | 14.7 (tied to $u_7$ )    |
| $u_{20}$   | N(4)...C(5)   | 402.3(4)  | 6.5 (fixed)              |
| $u_{21}$   | N(4)...C(8)   | 474.5(8)  | 13.0(6)                  |
| $u_{22}^d$ | N(4)...C(11)  | 496.0(7)  | 12.3(8)                  |
| $u_{23}$   | N(4)...C(12)  | 456.6(9)  | 13.0 (tied to $u_{21}$ ) |
| $u_{24}$   | C(5)...C(6)   | 456.9(7)  | 12.2 (tied to $u_{21}$ ) |
| $u_{25}$   | C(5)...H(17)  | 219.3(6)  | 12.7(10)                 |
| $u_{26}$   | C(6)...C(8)   | 474.3(16) | 23.3 (tied to $u_{21}$ ) |
| $u_{27}$   | C(6)...C(11)  | 601.7(7)  | 10.1 (fixed)             |
| $u_{28}$   | C(6)...C(12)  | 444.5(13) | 23.3 (tied to $u_{21}$ ) |
| $u_{29}$   | C(7)...C(8)   | 547.7(8)  | 9.6 (tied to $u_{32}$ )  |
| $u_{30}$   | C(7)...C(11)  | 510.3(7)  | 16.4 (fixed)             |
| $u_{31}$   | C(7)...C(12)  | 526.7(12) | 13.4 (fixed)             |
| $u_{32}^d$ | C(8)...C(9)   | 543.6(16) | 24.1(22)                 |
| $u_{33}$   | C(8)...C(11)  | 244.1(7)  | 11.1(6)                  |
| $u_{34}^d$ | C(9)...C(11)  | 688.2(9)  | 24.4(17)                 |
| $u_{35}$   | C(9)...C(12)  | 566.4(13) | 12.6 (tied to $u_{32}$ ) |
| $u_{36}$   | C(10)...C(11) | 503.3(22) | 40.5 (tied to $u_{22}$ ) |
| $u_{37}$   | C(10)...C(12) | 579.2(18) | 15.8 (tied to $u_{32}$ ) |
| $u_{38}$   | C(11)...C(13) | 660.0(8)  | 20.4 (tied to $u_{34}$ ) |
| $u_{39}$   | C(11)...C(14) | 659.2(12) | 24.4 (tied to $u_{34}$ ) |
| $u_{40}$   | C(11)...H(17) | 272.6(24) | 16.4 (fixed)             |
| $u_{41}$   | C(11)...H(18) | 270.8(22) | 16.5 (fixed)             |
| $u_{42}$   | C(12)...C(13) | 468.8(21) | 25.7 (fixed)             |
| $u_{43}$   | C(12)...C(14) | 493.7(21) | 44.5 (tied to $u_{22}$ ) |
| $u_{44}$   | C(12)...H(18) | 271.5(25) | 16.7 (fixed)             |
| $u_{45}$   | C(12)...H(19) | 274.5(27) | 16.2 (fixed)             |

---

<sup>a</sup> See Figure 1 for atom numbering; all other distances were included in the refinement, but are not listed here.

<sup>b</sup> Estimated standard deviations, obtained in the least-squares refinement, are given in parentheses.

<sup>c</sup> Amplitudes not refined were fixed at the values obtained using the HF/6-31G\* force field.

<sup>d</sup> Restraints were applied to  $u_{22}$  [9.3(9)],  $u_{32}$  [33.6(34)] and  $u_{34}$  [19.6(20)], and also to the ratios of  $u_4/u_{33}$  [0.661(33)] and  $u_6/u_{12}$  [1.817(91)]. Uncertainties are 5% of the amplitude ratios.

**Table S4** Least-squares correlation matrix ( $\times 100$ ) for  $S(\text{NBu}^t)_3$ .<sup>a</sup>

|          | $p_7$ | $p_8$ | $p_{10}$ | $u_6$ | $u_7$ | $u_{12}$ | $u_{25}$ | $k_2$ |
|----------|-------|-------|----------|-------|-------|----------|----------|-------|
| $p_4$    | -50   | -70   | 54       |       |       |          |          |       |
| $p_7$    |       | 63    | -54      |       |       |          |          |       |
| $p_8$    |       |       | -70      |       |       |          |          |       |
| $p_{12}$ |       |       |          |       | -79   |          |          |       |
| $u_1$    |       |       |          |       |       |          |          | 63    |
| $u_4$    |       |       |          | 66    |       | 62       |          |       |
| $u_5$    |       |       |          | 51    |       |          | 56       |       |
| $u_6$    |       |       |          |       |       | 80       |          |       |

<sup>a</sup> Only elements with absolute values  $\geq 50\%$  are shown;  $k_2$  is a scale factor.
